# Supplementary material for: Polymorphism of Aspergillus Fumigatus Major Allergen Genes Associating with Their Isolated Sites Affects Their IgE Epitope Structures
Source: Research Square preprint supplement (doi:10.21203/rs.3.rs-155581/v1), 2021-02-02
Supplement: Supplementary file 1 [file 9116b7fd7d448f7450ec6e4d.xlsx]

## Sheet: TABLE 2
Table 2. Categolyzation of Aspergillus fumigatus based on their grouping and number of the tested isolates in the categolies, depending on their origins
Category	Group name				Number of strain
	Asp f 1	Asp f 2	Asp f 3		Total (%)	Environment	Disease
A	f1-1	f2-2	f3-1		11 (26)	7	4
B	f1-1	f2-2	f3-2		16 (38)	10	6
C	f1-1	f2-2	f3-3		2 (5)	0	2
D	f1-1	f2-3	f3-1		1 (2)	1	0
E	f1-1	f2-5	f3-2		10 (24)	10	0
F	f1-1	f2-6	f3-3		1 (2)	0	1
G	f1-1	f2-7	f3-2		1 (2)	1	0
